# Supplementary material for: Measurement of supramolecular effective molarities for intramolecular H-bonds in zinc porphyrin–imidazole complexes
Source: Royal Society of Chemistry journal article supplement (doi:10.1039/c3ob42246a), 2014-01-01
Supplement: c3ob42246a.pdf [file c3ob42246a.pdf]

# Measurement of Supramolecular Effective Molarities for Intramolecular H-bonds in Zinc Porphyrin-Imidazole Complexes

Michael A. Jinks, Hongmei Sun and Christopher A. Hunter\*

## Supplementary Information

### Partially Bound State Populations

The population of fully bound state,  $P_1$ , where the intramolecular H-bond is made, is given by Equation S1.

$$P_1 = \frac{4K_AEM}{1+4K_AEM} \quad (\text{S1})$$

The population of partially bound state,  $P_2$ , where the intramolecular H-bond is not made, is given by Equation S2.

$$P_2 = \frac{1}{1+4K_AEM} \quad (\text{S2})$$

**Table S1** – Occupancy of the fully bound H-bonded state ( $P_1$ ) in toluene (%).

| porphyrin | ligand    |           |           |           |
|-----------|-----------|-----------|-----------|-----------|
|           | 1         | 2         | 3         | 4         |
| P1a       | <i>nb</i> | 72        | <i>nb</i> | 87        |
| P2a       | 58        | <i>nb</i> | <i>nb</i> | 54        |
| P3a       | <i>nb</i> | 72        | <i>nb</i> | 73        |
| P4a       | <i>nb</i> | <i>nb</i> | <i>nb</i> | <i>nb</i> |

*nb* indicates complexes that do not form an intramolecular hydrogen bond.

**Table S2** – Occupancy of the fully bound H-bonded state ( $P_1$ ) in TCE (%).

| porphyrin | ligand    |           |           |           |
|-----------|-----------|-----------|-----------|-----------|
|           | 1         | 2         | 3         | 4         |
| P1a       | <i>nb</i> | 52        | 65        | 74        |
| P2a       | <i>nb</i> | 72        | <i>nb</i> | <i>nb</i> |
| P3a       | <i>nb</i> | 78        | 51        | 79        |
| P4a       | <i>nb</i> | <i>nb</i> | <i>nb</i> | <i>nb</i> |

*nb* indicates complexes that do not form an intramolecular hydrogen bond.

## Statistically-corrected equilibrium constants for formation of intramolecular H-bonds

Table S3 –  $K_{ref}$ EM values measured in toluene.<sup>a</sup>

| porphyrin | ligand    |           |           |           |
|-----------|-----------|-----------|-----------|-----------|
|           | 1         | 2         | 3         | 4         |
| P1a       | <i>nb</i> | 0.6       | <i>nb</i> | 1.7       |
| P2a       | <i>nb</i> | <i>nb</i> | <i>nb</i> | 0.3       |
| P3a       | <i>nb</i> | 0.6       | <i>nb</i> | 0.7       |
| P4a       | <i>nb</i> | <i>nb</i> | <i>nb</i> | <i>nb</i> |

<sup>a</sup> Errors are  $\pm 50\%$ . *nb* indicates complexes that do not make detectable H-bonds.

Table S4 –  $K_{ref}$ EM values measured in TCE.<sup>a</sup>

| porphyrin | ligand    |           |           |           |
|-----------|-----------|-----------|-----------|-----------|
|           | 1         | 2         | 3         | 4         |
| P1a       | <i>nb</i> | 0.3       | 0.5       | 0.7       |
| P2a       | <i>nb</i> | 0.6       | <i>nb</i> | <i>nb</i> |
| P3a       | <i>nb</i> | 0.9       | 0.3       | 0.9       |
| P4a       | <i>nb</i> | <i>nb</i> | <i>nb</i> | <i>nb</i> |

<sup>a</sup> Errors are  $\pm 50\%$ . *nb* indicates complexes that do not make detectable H-bonds.
